# Supplementary material
Source: Research Square preprint supplement (doi:10.21203/rs.3.rs-8888176/v1)
Supplement: Supplementary file 1 [file d14472be367c6d1fcb7bfdcf.docx]

**Appendix**

**Table 1. Relationship between Participants' Satisfaction Levels and Income Level of Participants**

|  | | **Overall Satisfaction Level with Services Received from HLC** | | | |  |
| --- | --- | --- | --- | --- | --- | --- |
| ***Not Satisfied*** | | ***Satisfied*** | |  |
| ***N*** | ***%*** | ***N*** | ***%*** | ***P value*** |
| **Income Status** | **My Income is Less than My Expenses** | 33**a** | 14.8 | 190 **b** | 85.2 | **0.046*** |
| **My Income is Equal to My Expenses** | 19 **a** | 8.3 | 211 **a** | 91.7 |  |
| **My Income is More than My Expenses** | 2 **a** | 5.6 | 34 **a** | 94.4 |  |
| **Educational Status** | **Illiterate** | 3 | 6.3 | 45 | 93.8 | 0.341 |
| **Primary/secondary school** | 39 | 12.5 | 273 | 87.5 |  |
| **High school** | 8 | 7.7 | 96 | 92.3 |  |
| **University/postgraduate** | 7 | 13.7 | 44 | 86.3 |  |
| **Social Security Entity** | **No** | 14 | 14.4 | 83 | 85.6 | 0.193 |
| **Yes** | 37 | 9.5 | 353 | 90.5 |  |
| **Marital Status** | **Married** | 51 | 11.5 | 392 | 88.5 | 0.545 |
| **Not Married** | 6 | 8.6 | 64 | 91.4 |  |
| **Sex** | **Female** | 54 | 11.7 | 409 | 88.3 | 0.456 |
| **Male** | 3 | 6.8 | 41 | 80.7 |  |
| **Home Ownership Status** | **Living in their own home** | 35 | 11.4 | 271 | 88.6 | 0.660 |
| **Not living in their own home** | 19 | 10.1 | 170 | 89.9 |  |

*Chi-square test was used. Bonferroni correction was applied. Each subscript letter denotes a subset of categories whose column proportions do not differ significantly from each other at the .05 level. Groups bearing different subscripts are significantly different.

**Table 2: Relationship between Sociodemographic Variables and the Intention to Continue Using SHLC Services**

|  | | **Intention to Continue Using HLC Services** | | | |  |
| --- | --- | --- | --- | --- | --- | --- |
| ***Not considering it*** | | ***Considering it*** | |  |
| ***N*** | ***%*** | ***N*** | ***% /*** | ***P value*** |
| **Educational Status** | Illiterate | 13 **a** | 27.1 | 35 **b** | 72.9 | **<0.001*** |
| Primary/secondary school | 66 **a** | 20.6 | 255 **b** | 79.4 |
| High school | 3 **a** | 2.9 | 102 **b** | 97.1 |
| University/postgraduate | 3 **a** | 5.9 | 48 **b** | 94.1 |  |
| **Social Security Entity** | No | 24 | 23.8 | 77 | 76.2 | **0.009*** |
| Yes | 52 | 13.1 | 344 | 86.9 |
| **Marital Status** | Married | 77 | 17.1 | 374 | 82.9 | 0.239 |
| Not Married | 8 | 11.1 | 64 | 88.9 |  |
| **Sex** | **Female** | 79 | 16.7 | 394 | 83.3 | 0.127 |
| **Male** | 3 | 6.8 | 41 | 93.2 |  |
| **Home Ownership Status** | **Living in their own home** | 55 | 17.5 | 259 | 82.5 | 0.210 |
| **Not living in their own home** | 25 | 13.1 | 166 | 86.9 |  |
| **Income Status** | **My Income is Less than My Expenses** | 43 | 19.2 | 181 | 80.8 | 0.125 |
| **My Income is Equal to My Expenses** | 29 | 12.3 | 207 | 87.7 |  |
| **My Income is More than My Expenses** | 6 | 16.2 | 31 | 83.8 |  |

*Chi-square test was used. Bonferroni correction was applied. Each subscript letter denotes a subset of categories whose column proportions do not differ significantly from each other at the .05 level. Groups bearing different subscripts are significantly different.

**Table 6: Relationship between Sociodemographic Variables and the Perception of HLC Service Quality Compared to Other Healthcare Institutions**

|  | | **I Think HLC Services Are of Higher Quality Compared to Other Healthcare Institutions** | | | |  |
| --- | --- | --- | --- | --- | --- | --- |
| ***I Disagree*** | | ***I Agree*** | |  |
| ***N*** | ***%*** | ***N*** | ***%*** | ***P value*** |
| **Educational Status** | **Illiterate** | 13 **a** | 27.7 | 34 **a** | 72.3 | **0.009*** |
| **Primary/secondary school** | 104 **a** | 32.9 | 212 **b** | 67.1 |
| **High school** | 16 **a** | 15.8 | 85 **b** | 84.2 |
| **University/postgraduate** | 12 **a** | 24.5 | 37 **a** | 75.5 |
| **Income Status** | **My Income is Less than My Expenses** | 77 **a** | 34.5 | 146 **b** | 65.5 | **0.001*** |
| **My Income is Equal to My Expenses** | 46 **a** | 20.1 | 183 **b** | 79.9 |
| **My Income is More than My Expenses** | 13 **a** | 36.1 | 23 **a** | 63.9 |
| **Social Security Entity** | **No** | 33 | 33.3 | 66 | 66.7 | 0.127 |
| **Yes** | 98 | 25.3 | 289 | 74.7 |  |
| **Marital Status** | **Married** | 126 | 28.5 | 316 | 71.5 | 0.887 |
| **Not Married** | 19 | 27.5 | 50 | 72.5 |  |
| **Sex** | **Female** | 134 | 29.1 | 327 | 70.9 | 0.293 |
| **Male** | 9 | 20.5 | 35 | 79.5 |  |
| **Home Ownership Status** | **Living in their own home** | **83** | 27.0 | 224 | 73.0 | 0.606 |
| **Not living in their own home** | **55** | 29.4 | 132 | 70.6 |  |

*Chi-square test was used. Bonferroni correction was applied. Each subscript letter denotes a subset of categories whose column proportions do not differ significantly from each other at the .05 level. Groups bearing different subscripts are significantly different.
